# Supplementary material
Source: publisher site journal article supplement (https://bdj.pensoft.net/lib/ajax_srv/article_elements_srv.php?action=download_suppl_file&instance_id=750274)
Supplement: Supplementary file [file article_elements_srv.php]

Jun 1, 2013 - Jun 1, 2014

All Sessions  
100.00%

+ Add Segment

Explorer

Summary

| Language                  | Acquisition                                                            |                                                              |                                                                | Behavior                                                     |                                                            |                                                              | Conversions                                                |                                                  |                                                            |
|---------------------------|------------------------------------------------------------------------|--------------------------------------------------------------|----------------------------------------------------------------|--------------------------------------------------------------|------------------------------------------------------------|--------------------------------------------------------------|------------------------------------------------------------|--------------------------------------------------|------------------------------------------------------------|
|                           | Sessions                                                               | % New Sessions                                               | New Users                                                      | Bounce Rate                                                  | Pages / Session                                            | Avg. Session Duration                                        | Goal Conversion Rate                                       | Goal Completions                                 | Goal Value                                                 |
|                           | <b>1,638,764</b><br><small>% of Total: 100.00%<br/>(1,638,764)</small> | <b>33.66%</b><br><small>Site Avg: 33.60%<br/>(0.16%)</small> | <b>551,605</b><br><small>% of Total: 100.16% (550,703)</small> | <b>33.01%</b><br><small>Site Avg: 33.01%<br/>(0.00%)</small> | <b>11.32</b><br><small>Site Avg: 11.32<br/>(0.00%)</small> | <b>00:12:07</b><br><small>Site Avg: 00:12:07 (0.00%)</small> | <b>0.00%</b><br><small>Site Avg: 0.00%<br/>(0.00%)</small> | <b>0</b><br><small>% of Total: 0.00% (0)</small> | <b>\$0.00</b><br><small>% of Total: 0.00% (\$0.00)</small> |
| 1. <a href="#">en-us</a>  | <b>566,081</b> (34.54%)                                                | 38.86%                                                       | 220,000 (39.88%)                                               | 38.41%                                                       | 10.91                                                      | 00:10:58                                                     | 0.00%                                                      | 0 (0.00%)                                        | \$0.00 (0.00%)                                             |
| 2. <a href="#">es</a>     | <b>294,958</b> (18.00%)                                                | 27.87%                                                       | 82,218 (14.91%)                                                | 26.29%                                                       | 14.36                                                      | 00:15:10                                                     | 0.00%                                                      | 0 (0.00%)                                        | \$0.00 (0.00%)                                             |
| 3. <a href="#">pt-br</a>  | <b>180,655</b> (11.02%)                                                | 27.48%                                                       | 49,638 (9.00%)                                                 | 24.02%                                                       | 9.82                                                       | 00:11:50                                                     | 0.00%                                                      | 0 (0.00%)                                        | \$0.00 (0.00%)                                             |
| 4. <a href="#">es-es</a>  | <b>134,068</b> (8.18%)                                                 | 29.97%                                                       | 40,178 (7.28%)                                                 | 30.91%                                                       | 13.39                                                      | 00:13:49                                                     | 0.00%                                                      | 0 (0.00%)                                        | \$0.00 (0.00%)                                             |
| 5. <a href="#">fr</a>     | <b>79,440</b> (4.85%)                                                  | 28.61%                                                       | 22,724 (4.12%)                                                 | 26.64%                                                       | 12.59                                                      | 00:16:05                                                     | 0.00%                                                      | 0 (0.00%)                                        | \$0.00 (0.00%)                                             |
| 6. <a href="#">zh-cn</a>  | <b>43,169</b> (2.63%)                                                  | 23.32%                                                       | 10,067 (1.83%)                                                 | 23.58%                                                       | 11.14                                                      | 00:13:46                                                     | 0.00%                                                      | 0 (0.00%)                                        | \$0.00 (0.00%)                                             |
| 7. <a href="#">de-de</a>  | <b>42,734</b> (2.61%)                                                  | 37.58%                                                       | 16,061 (2.91%)                                                 | 35.85%                                                       | 8.99                                                       | 00:11:45                                                     | 0.00%                                                      | 0 (0.00%)                                        | \$0.00 (0.00%)                                             |
| 8. <a href="#">en-gb</a>  | <b>32,600</b> (1.99%)                                                  | 38.03%                                                       | 12,398 (2.25%)                                                 | 41.44%                                                       | 8.15                                                       | 00:07:49                                                     | 0.00%                                                      | 0 (0.00%)                                        | \$0.00 (0.00%)                                             |
| 9. <a href="#">es-419</a> | <b>29,290</b> (1.79%)                                                  | 28.77%                                                       | 8,428 (1.53%)                                                  | 27.58%                                                       | 12.78                                                      | 00:13:39                                                     | 0.00%                                                      | 0 (0.00%)                                        | \$0.00 (0.00%)                                             |
| 10. <a href="#">de</a>    | <b>22,002</b> (1.34%)                                                  | 42.30%                                                       | 9,307 (1.69%)                                                  | 39.30%                                                       | 7.55                                                       | 00:09:49                                                     | 0.00%                                                      | 0 (0.00%)                                        | \$0.00 (0.00%)                                             |
| 11. <a href="#">ru</a>    | <b>19,164</b> (1.17%)                                                  | 26.14%                                                       | 5,009 (0.91%)                                                  | 42.46%                                                       | 7.87                                                       | 00:10:09                                                     | 0.00%                                                      | 0 (0.00%)                                        | \$0.00 (0.00%)                                             |
| 12. <a href="#">es-mx</a> | <b>17,983</b> (1.10%)                                                  | 28.84%                                                       | 5,187 (0.94%)                                                  | 19.44%                                                       | 16.54                                                      | 00:15:48                                                     | 0.00%                                                      | 0 (0.00%)                                        | \$0.00 (0.00%)                                             |
| 13. <a href="#">fr-fr</a> | <b>13,005</b> (0.79%)                                                  | 34.79%                                                       | 4,525 (0.82%)                                                  | 45.37%                                                       | 8.38                                                       | 00:06:57                                                     | 0.00%                                                      | 0 (0.00%)                                        | \$0.00 (0.00%)                                             |
| 14. <a href="#">zh-tw</a> | <b>11,458</b> (0.70%)                                                  | 31.97%                                                       | 3,663 (0.66%)                                                  | 32.90%                                                       | 7.66                                                       | 00:09:32                                                     | 0.00%                                                      | 0 (0.00%)                                        | \$0.00 (0.00%)                                             |
| 15. <a href="#">en</a>    | <b>11,334</b> (0.69%)                                                  | 59.93%                                                       | 6,792 (1.23%)                                                  | 57.12%                                                       | 5.22                                                       | 00:05:16                                                     | 0.00%                                                      | 0 (0.00%)                                        | \$0.00 (0.00%)                                             |
| 16. <a href="#">it</a>    | <b>10,534</b> (0.64%)                                                  | 37.44%                                                       | 3,944 (0.72%)                                                  | 39.88%                                                       | 6.44                                                       | 00:07:03                                                     | 0.00%                                                      | 0 (0.00%)                                        | \$0.00 (0.00%)                                             |
| 17. <a href="#">pl</a>    | <b>9,951</b> (0.61%)                                                   | 31.50%                                                       | 3,135 (0.57%)                                                  | 37.99%                                                       | 11.91                                                      | 00:11:31                                                     | 0.00%                                                      | 0 (0.00%)                                        | \$0.00 (0.00%)                                             |
| 18. <a href="#">it-it</a> | <b>8,530</b> (0.52%)                                                   | 41.02%                                                       | 3,499 (0.63%)                                                  | 43.33%                                                       | 8.36                                                       | 00:08:20                                                     | 0.00%                                                      | 0 (0.00%)                                        | \$0.00 (0.00%)                                             |
| 19. <a href="#">ko</a>    | <b>8,158</b> (0.50%)                                                   | 25.78%                                                       | 2,103 (0.38%)                                                  | 23.17%                                                       | 12.90                                                      | 00:15:09                                                     | 0.00%                                                      | 0 (0.00%)                                        | \$0.00 (0.00%)                                             |
| 20. <a href="#">ja</a>    | <b>7,958</b> (0.49%)                                                   | 35.66%                                                       | 2,838 (0.51%)                                                  | 33.74%                                                       | 8.48                                                       | 00:07:19                                                     | 0.00%                                                      | 0 (0.00%)                                        | \$0.00 (0.00%)                                             |
| 21. <a href="#">nl</a>    | <b>7,402</b> (0.45%)                                                   | 41.21%                                                       | 3,050 (0.55%)                                                  | 45.56%                                                       | 8.13                                                       | 00:08:55                                                     | 0.00%                                                      | 0 (0.00%)                                        | \$0.00 (0.00%)                                             |
| 22. <a href="#">cs</a>    | <b>7,065</b> (0.43%)                                                   | 32.05%                                                       | 2,264 (0.41%)                                                  | 43.45%                                                       | 9.50                                                       | 00:08:19                                                     | 0.00%                                                      | 0 (0.00%)                                        | \$0.00 (0.00%)                                             |
| 23. <a href="#">ru-ru</a> | <b>6,920</b> (0.42%)                                                   | 28.54%                                                       | 1,975 (0.36%)                                                  | 36.66%                                                       | 7.77                                                       | 00:09:19                                                     | 0.00%                                                      | 0 (0.00%)                                        | \$0.00 (0.00%)                                             |
| 24. <a href="#">ja-jp</a> | <b>6,170</b> (0.38%)                                                   | 33.42%                                                       | 2,062 (0.37%)                                                  | 36.35%                                                       | 7.67                                                       | 00:07:00                                                     | 0.00%                                                      | 0 (0.00%)                                        | \$0.00 (0.00%)                                             |
| 25. <a href="#">pt-pt</a> | <b>5,616</b> (0.34%)                                                   | 34.08%                                                       | 1,914 (0.35%)                                                  | 33.19%                                                       | 9.89                                                       | 00:10:06                                                     | 0.00%                                                      | 0 (0.00%)                                        | \$0.00 (0.00%)                                             |
| 26. <a href="#">es-ar</a> | <b>5,008</b> (0.31%)                                                   | 36.50%                                                       | 1,828 (0.33%)                                                  | 23.20%                                                       | 13.14                                                      | 00:12:30                                                     | 0.00%                                                      | 0 (0.00%)                                        | \$0.00 (0.00%)                                             |

| Rank | Language Pair | Downloads | Percentage | Users  | Percentage | Revenue | Time   | Percentage | Count    | Revenue |   |         |        |         |
|------|---------------|-----------|------------|--------|------------|---------|--------|------------|----------|---------|---|---------|--------|---------|
| 27.  | ko-kr         | 4,497     | (0.27%)    | 28.40% | 1,277      | (0.23%) | 28.11% | 12.64      | 00:12:56 | 0.00%   | 0 | (0.00%) | \$0.00 | (0.00%) |
| 28.  | sv-se         | 3,962     | (0.24%)    | 20.75% | 822        | (0.15%) | 27.49% | 7.36       | 00:08:58 | 0.00%   | 0 | (0.00%) | \$0.00 | (0.00%) |
| 29.  | nl-nl         | 2,985     | (0.18%)    | 52.36% | 1,563      | (0.28%) | 56.31% | 4.64       | 00:02:58 | 0.00%   | 0 | (0.00%) | \$0.00 | (0.00%) |
| 30.  | tr            | 2,968     | (0.18%)    | 57.21% | 1,698      | (0.31%) | 45.75% | 11.44      | 00:05:42 | 0.00%   | 0 | (0.00%) | \$0.00 | (0.00%) |
| 31.  | vi            | 2,905     | (0.18%)    | 49.91% | 1,450      | (0.26%) | 45.71% | 5.49       | 00:06:49 | 0.00%   | 0 | (0.00%) | \$0.00 | (0.00%) |
| 32.  | ca            | 2,689     | (0.16%)    | 38.38% | 1,032      | (0.19%) | 20.97% | 12.51      | 00:20:44 | 0.00%   | 0 | (0.00%) | \$0.00 | (0.00%) |
| 33.  | id            | 2,656     | (0.16%)    | 51.92% | 1,379      | (0.25%) | 49.40% | 5.55       | 00:08:43 | 0.00%   | 0 | (0.00%) | \$0.00 | (0.00%) |
| 34.  | th            | 2,561     | (0.16%)    | 52.83% | 1,353      | (0.25%) | 50.84% | 4.62       | 00:05:57 | 0.00%   | 0 | (0.00%) | \$0.00 | (0.00%) |
| 35.  | cs-cz         | 1,724     | (0.11%)    | 24.13% | 416        | (0.08%) | 28.19% | 13.79      | 00:14:11 | 0.00%   | 0 | (0.00%) | \$0.00 | (0.00%) |
| 36.  | sk            | 1,476     | (0.09%)    | 38.89% | 574        | (0.10%) | 51.15% | 5.09       | 00:05:27 | 0.00%   | 0 | (0.00%) | \$0.00 | (0.00%) |
| 37.  | sv            | 1,466     | (0.09%)    | 37.24% | 546        | (0.10%) | 46.18% | 6.27       | 00:06:18 | 0.00%   | 0 | (0.00%) | \$0.00 | (0.00%) |
| 38.  | tr-tr         | 1,398     | (0.09%)    | 52.36% | 732        | (0.13%) | 45.49% | 10.66      | 00:06:33 | 0.00%   | 0 | (0.00%) | \$0.00 | (0.00%) |
| 39.  | hu            | 1,386     | (0.08%)    | 55.56% | 770        | (0.14%) | 57.14% | 4.16       | 00:02:45 | 0.00%   | 0 | (0.00%) | \$0.00 | (0.00%) |
| 40.  | es-us         | 1,226     | (0.07%)    | 53.59% | 657        | (0.12%) | 51.47% | 4.92       | 00:05:20 | 0.00%   | 0 | (0.00%) | \$0.00 | (0.00%) |
| 41.  | th-th         | 1,202     | (0.07%)    | 39.27% | 472        | (0.09%) | 50.92% | 4.03       | 00:05:13 | 0.00%   | 0 | (0.00%) | \$0.00 | (0.00%) |
| 42.  | hu-hu         | 1,133     | (0.07%)    | 62.22% | 705        | (0.13%) | 59.22% | 3.05       | 00:02:03 | 0.00%   | 0 | (0.00%) | \$0.00 | (0.00%) |
| 43.  | da            | 1,086     | (0.07%)    | 51.84% | 563        | (0.10%) | 48.25% | 6.63       | 00:05:32 | 0.00%   | 0 | (0.00%) | \$0.00 | (0.00%) |
| 44.  | es-cl         | 1,086     | (0.07%)    | 37.11% | 403        | (0.07%) | 31.31% | 9.32       | 00:10:13 | 0.00%   | 0 | (0.00%) | \$0.00 | (0.00%) |
| 45.  | el            | 976       | (0.06%)    | 54.20% | 529        | (0.10%) | 57.38% | 3.44       | 00:02:10 | 0.00%   | 0 | (0.00%) | \$0.00 | (0.00%) |
| 46.  | ar            | 929       | (0.06%)    | 73.41% | 682        | (0.12%) | 62.43% | 2.63       | 00:02:09 | 0.00%   | 0 | (0.00%) | \$0.00 | (0.00%) |
| 47.  | en-au         | 842       | (0.05%)    | 31.24% | 263        | (0.05%) | 39.67% | 5.16       | 00:06:08 | 0.00%   | 0 | (0.00%) | \$0.00 | (0.00%) |
| 48.  | zh-hk         | 786       | (0.05%)    | 37.66% | 296        | (0.05%) | 36.13% | 6.23       | 00:06:09 | 0.00%   | 0 | (0.00%) | \$0.00 | (0.00%) |
| 49.  | es-la         | 777       | (0.05%)    | 34.62% | 269        | (0.05%) | 37.84% | 9.56       | 00:10:19 | 0.00%   | 0 | (0.00%) | \$0.00 | (0.00%) |
| 50.  | it            | 760       | (0.05%)    | 39.34% | 299        | (0.05%) | 36.05% | 11.64      | 00:13:39 | 0.00%   | 0 | (0.00%) | \$0.00 | (0.00%) |
| 51.  | fi-fi         | 733       | (0.04%)    | 41.88% | 307        | (0.06%) | 55.80% | 6.14       | 00:02:45 | 0.00%   | 0 | (0.00%) | \$0.00 | (0.00%) |
| 52.  | el-gr         | 677       | (0.04%)    | 66.62% | 451        | (0.08%) | 64.84% | 4.21       | 00:03:02 | 0.00%   | 0 | (0.00%) | \$0.00 | (0.00%) |
| 53.  | fil           | 673       | (0.04%)    | 69.24% | 466        | (0.08%) | 55.42% | 2.90       | 00:04:05 | 0.00%   | 0 | (0.00%) | \$0.00 | (0.00%) |
| 54.  | pt            | 625       | (0.04%)    | 44.16% | 276        | (0.05%) | 36.32% | 8.56       | 00:09:55 | 0.00%   | 0 | (0.00%) | \$0.00 | (0.00%) |
| 55.  | nb-no         | 605       | (0.04%)    | 44.63% | 270        | (0.05%) | 47.11% | 3.77       | 00:04:14 | 0.00%   | 0 | (0.00%) | \$0.00 | (0.00%) |
| 56.  | da-dk         | 604       | (0.04%)    | 62.91% | 380        | (0.07%) | 58.61% | 4.15       | 00:03:07 | 0.00%   | 0 | (0.00%) | \$0.00 | (0.00%) |
| 57.  | ro            | 575       | (0.04%)    | 56.35% | 324        | (0.06%) | 52.70% | 8.15       | 00:06:13 | 0.00%   | 0 | (0.00%) | \$0.00 | (0.00%) |
| 58.  | bg            | 527       | (0.03%)    | 68.50% | 361        | (0.07%) | 73.06% | 2.76       | 00:01:22 | 0.00%   | 0 | (0.00%) | \$0.00 | (0.00%) |
| 59.  | he            | 472       | (0.03%)    | 56.78% | 268        | (0.05%) | 50.64% | 5.15       | 00:03:31 | 0.00%   | 0 | (0.00%) | \$0.00 | (0.00%) |
| 60.  | ca-es         | 464       | (0.03%)    | 31.03% | 144        | (0.03%) | 28.02% | 9.34       | 00:14:17 | 0.00%   | 0 | (0.00%) | \$0.00 | (0.00%) |
| 61.  | et            | 462       | (0.03%)    | 43.94% | 203        | (0.04%) | 42.64% | 6.50       | 00:06:09 | 0.00%   | 0 | (0.00%) | \$0.00 | (0.00%) |
| 62.  | vi-vn         | 440       | (0.03%)    | 64.55% | 284        | (0.05%) | 61.14% | 4.59       | 00:03:48 | 0.00%   | 0 | (0.00%) | \$0.00 | (0.00%) |
| 63.  | uk            | 429       | (0.03%)    | 53.61% | 230        | (0.04%) | 51.75% | 3.89       | 00:04:06 | 0.00%   | 0 | (0.00%) | \$0.00 | (0.00%) |
| 64.  | es-xl         | 377       | (0.02%)    | 20.16% | 76         | (0.01%) | 45.62% | 8.90       | 00:06:50 | 0.00%   | 0 | (0.00%) | \$0.00 | (0.00%) |
| 65.  | fi            | 364       | (0.02%)    | 58.52% | 213        | (0.04%) | 54.40% | 3.50       | 00:02:03 | 0.00%   | 0 | (0.00%) | \$0.00 | (0.00%) |
| 66.  | pl-pl         | 353       | (0.02%)    | 76.77% | 271        | (0.05%) | 69.41% | 3.24       | 00:01:29 | 0.00%   | 0 | (0.00%) | \$0.00 | (0.00%) |

|      |                           |                    |        |             |        |       |          |       |           |                |
|------|---------------------------|--------------------|--------|-------------|--------|-------|----------|-------|-----------|----------------|
| 67.  | <a href="#">hr</a>        | <b>310</b> (0.02%) | 63.23% | 196 (0.04%) | 63.23% | 5.25  | 00:04:06 | 0.00% | 0 (0.00%) | \$0.00 (0.00%) |
| 68.  | <a href="#">c</a>         | <b>302</b> (0.02%) | 98.34% | 297 (0.05%) | 97.35% | 1.06  | 00:00:02 | 0.00% | 0 (0.00%) | \$0.00 (0.00%) |
| 69.  | <a href="#">hr-hr</a>     | <b>294</b> (0.02%) | 74.83% | 220 (0.04%) | 42.52% | 4.28  | 00:03:12 | 0.00% | 0 (0.00%) | \$0.00 (0.00%) |
| 70.  | <a href="#">ro-ro</a>     | <b>286</b> (0.02%) | 48.95% | 140 (0.03%) | 60.84% | 3.24  | 00:03:11 | 0.00% | 0 (0.00%) | \$0.00 (0.00%) |
| 71.  | <a href="#">lv</a>        | <b>258</b> (0.02%) | 62.02% | 160 (0.03%) | 64.73% | 10.56 | 00:05:23 | 0.00% | 0 (0.00%) | \$0.00 (0.00%) |
| 72.  | <a href="#">sl</a>        | <b>235</b> (0.01%) | 74.89% | 176 (0.03%) | 68.94% | 2.49  | 00:01:11 | 0.00% | 0 (0.00%) | \$0.00 (0.00%) |
| 73.  | <a href="#">sr</a>        | <b>231</b> (0.01%) | 79.65% | 184 (0.03%) | 64.94% | 2.45  | 00:01:22 | 0.00% | 0 (0.00%) | \$0.00 (0.00%) |
| 74.  | <a href="#">nb</a>        | <b>229</b> (0.01%) | 65.94% | 151 (0.03%) | 62.01% | 3.05  | 00:01:47 | 0.00% | 0 (0.00%) | \$0.00 (0.00%) |
| 75.  | <a href="#">es-pa</a>     | <b>186</b> (0.01%) | 31.72% | 59 (0.01%)  | 27.42% | 6.02  | 00:06:18 | 0.00% | 0 (0.00%) | \$0.00 (0.00%) |
| 76.  | <a href="#">en-ca</a>     | <b>183</b> (0.01%) | 52.46% | 96 (0.02%)  | 48.09% | 3.87  | 00:11:18 | 0.00% | 0 (0.00%) | \$0.00 (0.00%) |
| 77.  | <a href="#">en-za</a>     | <b>178</b> (0.01%) | 65.73% | 117 (0.02%) | 60.11% | 3.16  | 00:03:51 | 0.00% | 0 (0.00%) | \$0.00 (0.00%) |
| 78.  | <a href="#">es-co</a>     | <b>177</b> (0.01%) | 33.90% | 60 (0.01%)  | 22.03% | 11.92 | 00:14:41 | 0.00% | 0 (0.00%) | \$0.00 (0.00%) |
| 79.  | <a href="#">id-id</a>     | <b>164</b> (0.01%) | 65.85% | 108 (0.02%) | 57.32% | 3.97  | 00:04:43 | 0.00% | 0 (0.00%) | \$0.00 (0.00%) |
| 80.  | <a href="#">en_gb</a>     | <b>145</b> (0.01%) | 83.45% | 121 (0.02%) | 69.66% | 2.12  | 00:02:06 | 0.00% | 0 (0.00%) | \$0.00 (0.00%) |
| 81.  | <a href="#">he-il</a>     | <b>139</b> (0.01%) | 61.15% | 85 (0.02%)  | 59.71% | 5.40  | 00:03:42 | 0.00% | 0 (0.00%) | \$0.00 (0.00%) |
| 82.  | <a href="#">bg-bg</a>     | <b>121</b> (0.01%) | 17.36% | 21 (0.00%)  | 28.10% | 11.00 | 00:09:34 | 0.00% | 0 (0.00%) | \$0.00 (0.00%) |
| 83.  | <a href="#">no</a>        | <b>119</b> (0.01%) | 45.38% | 54 (0.01%)  | 52.94% | 7.08  | 00:03:25 | 0.00% | 0 (0.00%) | \$0.00 (0.00%) |
| 84.  | <a href="#">es-ni</a>     | <b>114</b> (0.01%) | 5.26%  | 6 (0.00%)   | 18.42% | 13.82 | 00:15:47 | 0.00% | 0 (0.00%) | \$0.00 (0.00%) |
| 85.  | <a href="#">ar-sa</a>     | <b>110</b> (0.01%) | 75.45% | 83 (0.02%)  | 62.73% | 3.25  | 00:02:57 | 0.00% | 0 (0.00%) | \$0.00 (0.00%) |
| 86.  | <a href="#">sl-si</a>     | <b>107</b> (0.01%) | 45.79% | 49 (0.01%)  | 55.14% | 2.59  | 00:01:18 | 0.00% | 0 (0.00%) | \$0.00 (0.00%) |
| 87.  | <a href="#">es-pe</a>     | <b>103</b> (0.01%) | 63.11% | 65 (0.01%)  | 33.01% | 11.94 | 00:08:17 | 0.00% | 0 (0.00%) | \$0.00 (0.00%) |
| 88.  | <a href="#">en_us</a>     | <b>89</b> (0.01%)  | 76.40% | 68 (0.01%)  | 66.29% | 1.73  | 00:01:41 | 0.00% | 0 (0.00%) | \$0.00 (0.00%) |
| 89.  | <a href="#">en-in</a>     | <b>86</b> (0.01%)  | 83.72% | 72 (0.01%)  | 70.93% | 2.05  | 00:02:50 | 0.00% | 0 (0.00%) | \$0.00 (0.00%) |
| 90.  | <a href="#">sk-sk</a>     | <b>80</b> (0.00%)  | 68.75% | 55 (0.01%)  | 83.75% | 1.40  | 00:00:13 | 0.00% | 0 (0.00%) | \$0.00 (0.00%) |
| 91.  | <a href="#">(not set)</a> | <b>74</b> (0.00%)  | 79.73% | 59 (0.01%)  | 67.57% | 4.70  | 00:04:32 | 0.00% | 0 (0.00%) | \$0.00 (0.00%) |
| 92.  | <a href="#">fr-ch</a>     | <b>73</b> (0.00%)  | 28.77% | 21 (0.00%)  | 30.14% | 6.30  | 00:06:36 | 0.00% | 0 (0.00%) | \$0.00 (0.00%) |
| 93.  | <a href="#">de-at</a>     | <b>70</b> (0.00%)  | 58.57% | 41 (0.01%)  | 60.00% | 7.27  | 00:05:03 | 0.00% | 0 (0.00%) | \$0.00 (0.00%) |
| 94.  | <a href="#">et-ee</a>     | <b>70</b> (0.00%)  | 28.57% | 20 (0.00%)  | 35.71% | 5.91  | 00:04:40 | 0.00% | 0 (0.00%) | \$0.00 (0.00%) |
| 95.  | <a href="#">de-ch</a>     | <b>65</b> (0.00%)  | 86.15% | 56 (0.01%)  | 69.23% | 1.98  | 00:00:24 | 0.00% | 0 (0.00%) | \$0.00 (0.00%) |
| 96.  | <a href="#">es-cr</a>     | <b>62</b> (0.00%)  | 32.26% | 20 (0.00%)  | 25.81% | 10.94 | 00:11:23 | 0.00% | 0 (0.00%) | \$0.00 (0.00%) |
| 97.  | <a href="#">fa-ir</a>     | <b>59</b> (0.00%)  | 52.54% | 31 (0.01%)  | 45.76% | 5.98  | 00:07:09 | 0.00% | 0 (0.00%) | \$0.00 (0.00%) |
| 98.  | <a href="#">ja-jp-mac</a> | <b>56</b> (0.00%)  | 23.21% | 13 (0.00%)  | 10.71% | 7.18  | 00:07:22 | 0.00% | 0 (0.00%) | \$0.00 (0.00%) |
| 99.  | <a href="#">es-ec</a>     | <b>55</b> (0.00%)  | 47.27% | 26 (0.00%)  | 30.91% | 11.40 | 00:13:49 | 0.00% | 0 (0.00%) | \$0.00 (0.00%) |
| 100. | <a href="#">fa</a>        | <b>52</b> (0.00%)  | 55.77% | 29 (0.01%)  | 34.62% | 5.92  | 00:11:19 | 0.00% | 0 (0.00%) | \$0.00 (0.00%) |
